# Supplementary material for: High Levels of Genomic Aberrations in Serous Ovarian Cancers Are Associated with Better Survival
Source: PLoS One. 2013 Jan 23;8(1):e54356. doi: 10.1371/journal.pone.0054356 (PMC3553118; doi:10.1371/journal.pone.0054356)
Supplement: Table S1 — Additional clinical data for the Norwegian cohort. (XLSX) [file pone.0054356.s003.xlsx]

## Sheet: Table S1
Table S1: Additional clinical data for the Norwegian cohort.
ID	Histology	Stage	Grade	Age at diagnosis	Event	Progression	OS	PFS	Chemotherapy	TAI
1	1	3	2	2	2	2	25.69	14.77	1	0.033
2	1	3	3	1	1	2	154.8	125.95	1	0.176
3	1	3	3	2	2	2	30.63	13.72	1	0.086
4	1	4	3	1	2	2	15.07	10.36	2	0.123
5	1	4	3	2	2	2	37.11	20.92	1	0.074
6	1	3	3	2	2	2	20.86	9.93	2	0.056
7	1	3	3	2	2	2	9.41	6.22	2	0.151
8	1	4	3	1	2	2	6.15	4.8	2	0.078
9	1	3	3	2	2	2	11.35	9.51	2	0.083
10	1	3	3	1	2	2	13.49	4.38	2	0.047
11	1	4	2	2	2	2	9.01	5.76	2	0.138
12	1	4	3	1	2	2	9.24	6.25	2	0.134
13	1	3	3	1	2	2	9.05	9.05	2	0.046
14	1	4	3	2	2	2	11.18	4.77	2	0.117
15	1	3	2	2	2	2	143.26	38.82	1	0.229
16	1	4	3	2	2	2	9.21	7.2	2	0.136
17	1	2	2	1	2	2	29.08	14.54	1	0.145
18	1	3	2	1	2	2	13.78	13.39	1	0.183
19	1	4	3	2	2	2	6.41	5.36	2	0.15
20	1	3	3	2	2	2	57.43	25.82	1	0.201
21	1	3	3	1	2	2	21.12	3.49	2	0.074
22	1	3	3	2	2	2	134.44	50.82	1	0.208
23	1	4	2	1	2	2	21.51	11.09	2	0.098
24	1	4	3	2	2	2	23.45	12.83	1	0.149
25	1	3	3	2	2	2	55.43	14.38	1	0.135
26	1	4	2	2	2	2	60.46	24.08	1	0.132
27	1	3	3	2	1	1	128.03	128.03	1	0.102
28	1	3	3	1	2	2	26.78	10.39	1	0.099
29	1	3	3	1	2	2	9.47	5.33	2	0.121
30	1	3	2	1	2	2	101.88	50.1	1	0.203
31	1	3	3	1	2	2	58.45	40.46	1	0.188
32	1	3	2	2	2	2	85.23	24.28	1	0.14
33	1	3	3	2	2	2	53.88	35.43	1	0.124
34	1	3	3	1	2	2	16.97	23.72	1	0.116
35	1	3	3	1	2	2	69.84	25.59	1	0.197
36	1	4	2	1	2	2	19.11	11.61	2	0.086
37	1	3	3	2	2	2	50.07	16.74	1	0.157
38	1	3	2	1	2	2	32.73	15.53	1	0.108
39	1	4	1	2	2	2	50.99	24.84	1	0.047
40	1	3	3	1	2	2	33.82	15.2	1	0.165
41	1	3	3	1	2	2	74.08	42.2	1	0.052
42	1	3	3	1	1	1	113.98	113.98	1	0.208
43	1	3	1	1	1	1	109.9	109.9	1	0.152
44	1	3	3	1	2	2	5.07	4.9	2	0.125
45	1	2	3	1	2	2	46.55	38.03	1	0.07
46	1	4	3	1	2	2	92.14	17.66	1	0.173
47	1	3	2	1	2	2	13.55	12.07	2	0.089
48	1	3	2	2	2	2	15.3	14.54	1	0.101
49	1	4	3	2	2	2	111.97	65.82	1	0.061
50	1	3	1	2	2	2	65.23	25.79	1	0.024
51	1	4	2	1	2	2	23.68	13.65	1	0.165
52	1	3	3	2	2	2	24.64	20.89	1	0.058
53	1	4	3	1	2	2	7.3	5.92	2	0.188
54	1	3	3	2	2	2	29.21	15.49	1	0.131
55	1	2	2	1	1	1	98.68	98.68	1	0.187
56	1	3	3	1	1	1	106.12	106.12	1	0.216
57	1	4	2	1	2	2	22.8	4.84	2	0.162
58	1	3	2	2	2	2	55.86	32.24	1	0.141
59	1	3	3	2	2	2	36.02	26.32	1	0.226
60	1	3	3	2	2	2	29.14	16.51	1	0.066
61	1	4	3	2	2	2	46.12	18.26	1	0.187
62	1	3	3	2	2	2	30.66	14.77	1	0.134
63	1	3	2	2	2	2	42.07	15.86	1	0.213
64	1	4	3	2	2	2	39.08	22.07	1	0.231
65	1	4	3	2	2	2	16.18	17.96	1	0.184
66	1	3	3	2	2	2	43.65	24.05	1	0.114
67	1	3	3	2	2	2	21.45	12.11	2	0.088
68	1	3	3	1	1	2	68.88	37.73	1	0.194
69	1	3	2	1	2	2	48.03	8.75	2	0.2
70	1	3	3	2	2	2	4.77	3.68	2	0.067
71	1	3	2	2	2	2	31.51	20.82	1	0.192
72	1	3	2	2	1	2	67.4	52.34	1	0.164
73	1	3	3	1	2	2	46.81	17.73	1	0.122
74	1	3	3	2	2	2	54.77	16.32	1	0.184
Details for the clinicopathological characteristics
ID (Patient ID)
Histology (serous=1)
Stage (IIC=2, IIIB=3, IIIC=3, IV=4)
Grade (1, 2, 3)
Age at diagnosis (below 60=1; above 60=2))
Event (alive=1, dead=2)
Progression (no progression=1, progression=2)
OS (n=months)
PFS (n=months)
Chemotherapy (sensitive=1, resistant=2)
TAI (Total Aberration Index)
